# Supplementary material
Source: PubMed Central journal article supplement (PMC10111353)

# Computational modeling of TGF- $\beta$ 2:T $\beta$ RI:T $\beta$ RII receptor complex assembly as mediated by the TGF- $\beta$ coreceptor betaglycan

Aasakiran Madamanchi,<sup>1</sup> Michelle Ingle,<sup>1</sup> Andrew P. Hinck,<sup>2</sup> and David M. Umulis<sup>1,3,\*</sup>

<sup>1</sup>Department of Agricultural and Biological Engineering, Purdue University, West Lafayette, Indiana; <sup>2</sup>Department of Structural Biology, University of Pittsburgh School of Medicine, Pittsburgh, Pennsylvania; and <sup>3</sup>Weldon School of Biomedical Engineering, Purdue University, West Lafayette, Indiana

**ABSTRACT** Transforming growth factor- $\beta$ 1, - $\beta$ 2, and - $\beta$ 3 (TGF- $\beta$ 1, - $\beta$ 2, and - $\beta$ 3) are secreted signaling ligands that play essential roles in tissue development, tissue maintenance, immune response, and wound healing. TGF- $\beta$  ligands form homodimers and signal by assembling a heterotetrameric receptor complex comprised of two type I receptor (T $\beta$ RI):type II receptor (T $\beta$ RII) pairs. TGF- $\beta$ 1 and TGF- $\beta$ 3 ligands signal with high potency due to their high affinity for T $\beta$ RII, which engenders high-affinity binding of T $\beta$ RI through a composite TGF- $\beta$ :T $\beta$ RII binding interface. However, TGF- $\beta$ 2 binds T $\beta$ RII 200–500 more weakly than TGF- $\beta$ 1 and TGF- $\beta$ 3 and signals with lower potency compared with these ligands. Remarkably, the presence of an additional membrane-bound coreceptor, known as betaglycan, increases TGF- $\beta$ 2 signaling potency to levels similar to TGF- $\beta$ 1 and - $\beta$ 3. The mediating effect of betaglycan occurs even though it is displaced from and not present in the heterotetrameric receptor complex through which TGF- $\beta$ 2 signals. Published biophysics studies have experimentally established the kinetic rates of the individual ligand-receptor and receptor-receptor interactions that initiate heterotetrameric receptor complex assembly and signaling in the TGF- $\beta$  system; however, current experimental approaches are not able to directly measure kinetic rates for the intermediate and latter steps of assembly. To characterize these steps in the TGF- $\beta$  system and determine the mechanism of betaglycan in the potentiation of TGF- $\beta$ 2 signaling, we developed deterministic computational models with different modes of betaglycan binding and varying cooperativity between receptor subtypes. The models identified conditions for selective enhancement of TGF- $\beta$ 2 signaling. The models provide support for additional receptor binding cooperativity that has been hypothesized but not evaluated in the literature. The models further showed that betaglycan binding to the TGF- $\beta$ 2 ligand through two domains provides an effective mechanism for transfer to the signaling receptors that has been tuned to efficiently promote assembly of the TGF- $\beta$ 2(T $\beta$ RII)<sub>2</sub>(T $\beta$ RI)<sub>2</sub> signaling complex.

**SIGNIFICANCE** Weldon School of Biomedical Engineering, Purdue University Signaling coreceptors promote receptor complex assembly and signaling and are widespread in biological systems, yet their mechanisms are generally poorly understood. In this study, we used published rate constants, together with computational modeling, to better understand how the TGF- $\beta$  coreceptor betaglycan, which has a large structured ectodomain, promotes assembly of signaling complex with T $\beta$ RI and T $\beta$ RII, both for TGF- $\beta$ 1 and - $\beta$ 3, which bind T $\beta$ RII with high affinity, and TGF- $\beta$ 2, which binds T $\beta$ RII with low affinity. Our modeling emphasized the importance of cooperative binding of T $\beta$ RI and T $\beta$ RII for driving assembly of the signaling complex and displacing the coreceptor—this was especially important for TGF- $\beta$ 2 with both T $\beta$ RII potentiating the binding of T $\beta$ RI and T $\beta$ RI potentiating the binding of T $\beta$ RII.

Submitted August 11, 2022, and accepted for publication February 27, 2023.

\*Correspondence: [dumulis@purdue.edu](mailto:dumulis@purdue.edu)

Aasakiran Madamanchi's present address is School of Information, University of Michigan, Ann Arbor, Michigan.

Editor: Sarah Veatch.

<https://doi.org/10.1016/j.bpj.2023.02.030>

© 2023 Biophysical Society.

This is an open access article under the CC BY-NC-ND license (<http://creativecommons.org/licenses/by-nc-nd/4.0/>).

## INTRODUCTION

Transforming growth factor- $\beta$  (TGF- $\beta$ ) signaling is mediated by three secreted ligands, TGF- $\beta$ 1, - $\beta$ 2, and - $\beta$ 3. The TGF- $\beta$  isoforms share 70–80% sequence identity and adopt similar homodimeric structures, consisting of two identical cystine-knotted protomers tethered together by a single inter-chain disulfide bond (1,2). TGF- $\beta$  signal transduction is

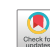

activated when the TGF- $\beta$  type I and type II receptors, T $\beta$ RI and T $\beta$ RII, are brought together by ligand binding to initiate a transphosphorylation reaction that results in phosphorylation of cytoplasmic Smad2 and Smad3, the canonical effectors of the pathway. Phospho-Smad2 and -Smad3, after forming a heterotrimeric complex with Smad4 (3), translocate to the nucleus where they regulate gene expression in partner with other coactivators and corepressors (4).

TGF- $\beta$ 1 and - $\beta$ 3 orchestrate assembly of their signaling complexes in a stepwise manner, first by binding T $\beta$ RII with high affinity to form a stable binary complex (5). The TGF- $\beta$ :T $\beta$ RII binary complex recruits T $\beta$ RI to form a highly stable ternary complex, consisting of one ligand homodimer bound to two molecules of T $\beta$ RI and two molecules of T $\beta$ RII (6,7). Although subsequent studies have shown that a TGF- $\beta$ (T $\beta$ RI:T $\beta$ RII)<sub>1</sub> heterodimer is capable of signaling, the most efficient signaling comes from a TGF- $\beta$ (T $\beta$ RI:T $\beta$ RII)<sub>2</sub> heterotetramer (8).

These cell-based observations are supported by binding and structural studies with purified TGF- $\beta$ s and receptor ectodomains, which demonstrate that T $\beta$ RII binds symmetrically to the fingertips of the extended TGF- $\beta$  monomers with high affinity and that T $\beta$ RI is recruited by binding a composite interface formed by both TGF- $\beta$  and T $\beta$ RII (9–13). The potentiation of T $\beta$ RI binding by T $\beta$ RII, which is mediated by direct contact between the T $\beta$ RII N-terminal tail and T $\beta$ RI (12), is difficult to quantitate owing to the very weak binding of T $\beta$ RI by TGF- $\beta$  but has been estimated to be as high as 10<sup>3</sup>-fold (13).

TGF- $\beta$ 2 binds T $\beta$ RII about 200 times more weakly than TGF- $\beta$ 1 and - $\beta$ 3 (9,14–16), and in cells lacking the TGF- $\beta$  type III receptor, also known as betaglycan (BG), its potency is reduced accordingly (9,15,17). BG is comprised of a large (~750 aa) ectodomain, a single-spanning transmembrane domain, and a short (42 aa) noncatalytic cytoplasmic tail and is considered a coreceptor as it binds TGF- $\beta$ s and potentiates receptor complex assembly and signaling, but does not directly participate in the phosphorylation-mediated signaling cascade (17,18). BG binds all three TGF- $\beta$  isoforms with high affinity ( $K_D = 5$ –20 nM) (19), although its potentiation of receptor complex assembly and signaling, which restores the TGF- $\beta$ 2 potency to that of TGF- $\beta$ 1 and - $\beta$ 3 (17,20), is greatest for TGF- $\beta$ 2. BG knockout mice are embryonic lethal (21) and share many of the phenotypic characteristics of the TGF- $\beta$ 2 knockout, including pronounced cardiac defects, confirming BG's importance for TGF- $\beta$ 2 signaling in vivo (22).

The extracellular domain of BG is comprised of two subdomains, the N-terminal membrane-distal orphan domain and the membrane-proximal zona pellucida, or ZP domain (19,20). The structure of the BG orphan domain, BG<sub>O</sub>, consists of two tandem  $\beta$ -sandwich domains connected together by a semirigid two-stranded  $\beta$ -sheet (23). The BG ZP domain, BG<sub>ZP</sub>, is likely comprised of tandem immunoglobulin-like domains, designated BG<sub>ZP-N</sub> and BG<sub>ZP-C</sub>, based on

available structures of BG<sub>ZP-C</sub> from rat (24) and mouse (25) and homology to the ZP domain of endoglin (26), a homologous coreceptor of the TGF- $\beta$  family that binds and promotes signaling of BMP-9 and -10.

BG has been suggested, based on cross-linking studies with radiolabeled TGF- $\beta$ 2, to potentiate assembly of the signaling complex by a handoff mechanism, in which BG initially captures TGF- $\beta$ 2 on the cell surface, and, after promoting binding of T $\beta$ RII to form a stable ternary complex, is displaced as T $\beta$ RI binds (17). More recent studies with purified full-length rat BG ectodomain (rBG<sub>O-ZP</sub>), and its subdomains, have shown that BG binds TGF- $\beta$ 2 dimers with 1:1 stoichiometry, with the orphan and ZP-C domain (rBG<sub>O</sub> and rBG<sub>ZP-C</sub>, respectively) both directly binding the growth factor (19,27). BG-binding blocks one of the T $\beta$ RII binding sites through its BG<sub>ZP-C</sub> domain, but leaves the other accessible, and has been proposed to promote binding of T $\beta$ RII both by membrane localization effects, and to a lesser extent allostery (27). Binding of the full-length BG extracellular domain was shown to block binding of T $\beta$ RI in the presence of T $\beta$ RII (27), indicating that recruitment of T $\beta$ RI is responsible for displacing BG as the signaling complex is formed.

Previous experimental approaches provide strong quantitative data about the initial receptor and ligand interactions in TGF- $\beta$  receptor complex assembly, as well as a qualitative understanding of receptor complex assembly and signaling, yet leave unanswered several questions regarding the assembly mechanism. Are the known rates for ligand-receptor interactions sufficient to explain observed TGF- $\beta$  signaling dynamics, or is there a significant role for weak interactions and alternative assembly pathways after the initial binding event that captures the ligand on the surface of the membrane? Other questions relate to the apparent paradox of how BG potentiates assembly of the signaling complex by binding TGF- $\beta$ s with near nanomolar affinity, but is ultimately displaced as the signaling receptors bind. To address these questions, we used deterministic computational modeling to assess complex assembly and signal generation based on published kinetic rate constants for as many of the steps as possible. In the limited number of cases where information was lacking, the values were estimated based on simulations over a range of plausible values. Results suggest that, in the absence of BG, T $\beta$ RI recruitment during heterotetramer receptor complex assembly is largely mediated by interactions between its ectodomain and that of T $\beta$ RII; this receptor-receptor interaction is particularly critical for TGF- $\beta$ 2 signaling. In addition, the results suggest that it is important to consider alternative pathways for receptor addition, especially for TGF- $\beta$ 2, which binds T $\beta$ RI and T $\beta$ RII with comparable weak affinity. Results for BG-dependent assembly reiterate the points noted above, but also suggest that BG's high affinity, achieved through bivalent binding, is critical for efficient handoff to the signaling receptors.

## MATERIALS AND METHODS

### Computational tools

We carried out deterministic modeling using a python ODE solver program called pySB. PySB is a framework for building mathematical rule-based models of biochemical systems (28). The deterministic model calculates a concentration of each individual species in simulation under different conditions. The nuclear pSmad signal from each TGF- $\beta$  signaling species was calculated using a computational model of intracellular TGF- $\beta$  signaling adapted from Schmierer et al. (29). The full pSmad signal used in a root mean-square error (RMSE) analysis was calculated from a weighted sum of TGF- $\beta$  signaling species. The detailed equation can be found in the [supporting material](#). PySB codes for the three receptor recruitment models can be found through GitHub (<https://github.com/ingole0/Thesis-Code>).

## RESULTS

### Receptor-receptor interactions and the SRR, TRR, and NRR models for assembly

The importance of the interaction between T $\beta$ RI and T $\beta$ RII for the initial recruitment of T $\beta$ RI into the TGF- $\beta$  signaling complex has been heavily studied (8,11–13,30), especially with TGF- $\beta$ 1 and - $\beta$ 3, which bind T $\beta$ RII with high affinity and in turn recruit T $\beta$ RI by enabling its binding to a composite TGF- $\beta$ :T $\beta$ RII interface. This is designated cooperative receptor recruitment and is illustrated in Fig. 1 A.

The assembly of the complex with TGF- $\beta$ 2, however, is not as well understood as it binds both T $\beta$ RI and T $\beta$ RII weakly (9,11,13). Thus, it may not assemble its receptors in the same type II, type I stepwise manner as TGF- $\beta$ 1 and TGF- $\beta$ 3. Moreover, for all three isoforms, although it is conceivable that the second T $\beta$ RI:T $\beta$ RII pair assembles in the same manner as the first pair, this is difficult to validate with the experimental tools available today. Computational modeling can shed light on alternative pathways for assembly, both in early and later stages, by assessing how accurately the models recapitulate experimental data for different reaction pathways. Fig. 1 C reflects this knowledge and depicts the reaction pathways incorporated in our models for assembly of the TGF- $\beta$ (T $\beta$ RI)<sub>2</sub>(T $\beta$ RII)<sub>2</sub> heterotetramer.

Three deterministic models were constructed to explore the importance of receptor-receptor interaction in T $\beta$ RI:T $\beta$ RII heterotetramer assembly. These models were constructed based on published surface plasmon resonance (SPR) data, which provide kinetic rates for many steps in the receptor assembly pathway, although not all. Table S1 shows the rates for the model, including literature references and a brief rationalization for their use.

A no receptor recruitment (NRR) model was constructed in which receptor complex assembly is assumed to occur solely through independent ligand receptor interactions. This model acts as a baseline or control for measuring changes in signaling in the receptor oligomerization system, and a control for testing the requirement for potentiation in heterotetramer oligomerization. The single-stage receptor

recruitment (SRR) model builds off of the NRR model but increases rates of T $\beta$ RI binding in the presence of T $\beta$ RII; this potentiation or cooperativity has been previously experimentally proven (8,11–13) and is pictured by the red arrows for reactions 4, 7, 11, and 16 in Fig. 1 C. The stabilized epitope between T $\beta$ RII and the ligand for increased binding of T $\beta$ RI (SRR model) suggests there should also be a similar stabilizing epitope between the ligand and T $\beta$ RI for increased binding of T $\beta$ RII. Therefore, a two-stage receptor recruitment (TRR) model was developed, which includes the cooperative recruitment represented in the SRR mode, but also a symmetric form of recruitment where ligand-bound T $\beta$ RI increases the affinity of T $\beta$ RII to the ligand complex. The recruitment of T $\beta$ RII by T $\beta$ RI, however, can only occur in the latter stages of assembly, after BG has been displaced, as BG blocks binding of T $\beta$ RI. Similar symmetric and/or additive cooperative receptor recruitment interactions have been found in other receptor proteins such as RXR nuclear receptor, TCR, proteinase-activated receptor 2, and TLR4 (31–33). The TRR model includes the increased kinetic rates for reactions 4, 7, 11, and 16 found in the SRR model, and also includes increased rates for reactions 5, 10, and 12, as visually represented by the red and blue arrows in Fig. 1 C. The recruitment of T $\beta$ RII by T $\beta$ RI has not been possible to test with biological methods due to the extremely low affinity of T $\beta$ RI to the ligand and the resulting difficulty in obtaining the complex for measurement by SPR. The computational approach used in this paper allowed us to test the validity of this symmetric receptor recruitment. In Fig. 1 C the black arrows are reactions that are the same between all receptor recruitment models developed. In the NRR model the kinetic rates for the blue and red reactions in Fig. 1 C, steps 4, 5, 7, 10–12, and 16 are assumed to be equivalent to the kinetic rates for the first addition of a T $\beta$ RI and T $\beta$ RII to the ligand.

### BG-mediated potentiation of receptor complex assembly and criteria for model selection

The next component added to our computational models, and the one on which this paper is mainly focused is the interaction of BG with TGF- $\beta$ 2. The previous data, both the initial cell-based cross-linking studies (17) and the more recent SPR and ITC-based binding studies with purified full-length BG and its subdomains (23,27,34), provide support for a handoff mechanism, as depicted in Fig. 1 B. There, however, is still some uncertainty. The available structural and binding data (12,13,27) suggest that a quaternary complex with TGF- $\beta$ :BG:T $\beta$ RII:T $\beta$ RI should exist; yet, in contrast to the TGF- $\beta$ :BG:T $\beta$ RII ternary complex, this was not captured in cell-based cross-linking experiments (17). This led to the suggestion that this species was transient, and therefore minimally contributed to the overall signal (27). The computational models created in this paper address the ambiguities of this proposed

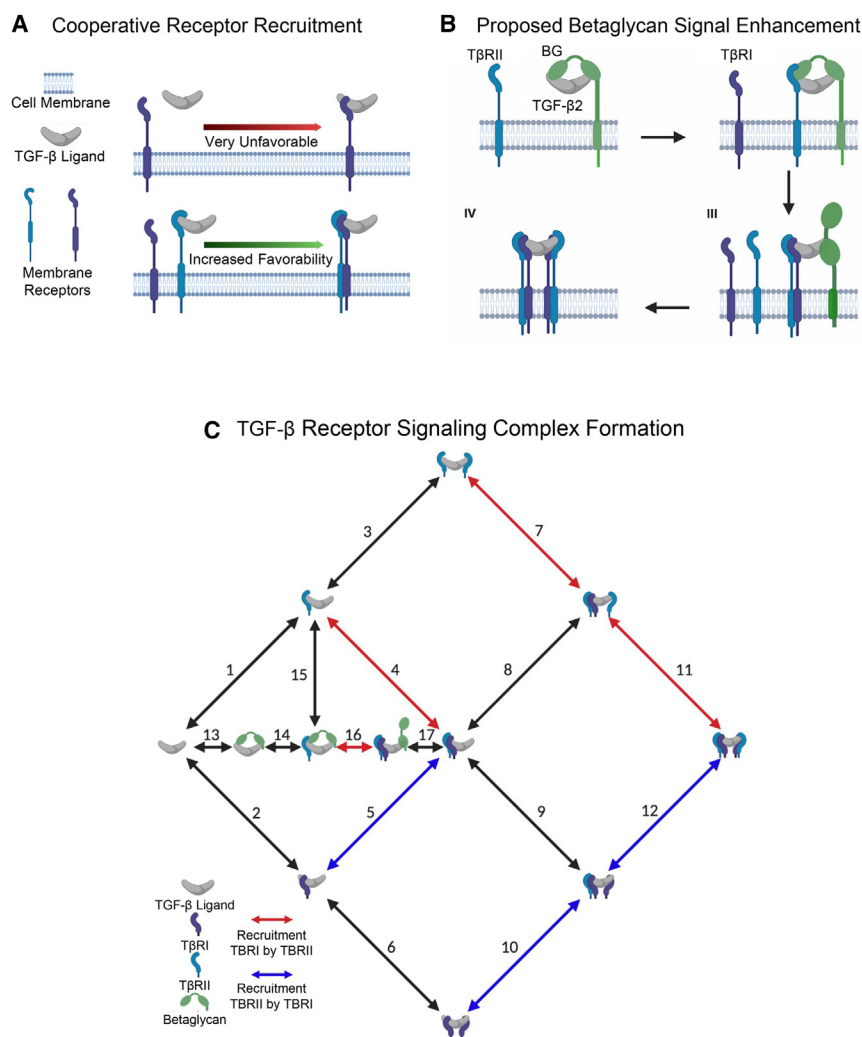

**FIGURE 1** Schematic and biology of TGF- $\beta$  receptor signaling complex formation. (A) Cooperative receptor recruitment is a biological interaction where the presence of one receptor increases the affinity of another receptor, usually a weak affinity receptor. (B) In the TGF- $\beta$ 2 system, betaglycan with two domains (orphan, BG-O, and zona-pellucida, BG-ZP, domains) is predicted to enhance TGF- $\beta$ 2 signaling by increasing the affinity of the T $\beta$ RII (blue receptor). Betaglycan dissociates and T $\beta$ RI (purple receptor) binds, creating half of the tetrameric signaling complex. (C) All three TGF- $\beta$  ligands (TGF- $\beta$ 1/2/3) signal through a tetrameric signaling complex composed of two type II receptors (blue bean) and two type I receptors (purple bean) and its formation can be aided by a membrane bound coreceptor, betaglycan (green bean). Receptor complex assembly is formed through reversible reactions (double-sided arrows). The colored arrows indicate where cooperative receptor recruitment was found and/or tested. The single-stage receptor recruitment (SRR) model accounts for the recruitment of T $\beta$ RI by T $\beta$ RII (red arrows) and the two-stage receptor recruitment (TRR) model builds off the SRR model by further incorporating the recruitment of T $\beta$ RII by T $\beta$ RI (blue arrows). To see this figure in color, go online.

mechanism for BG-mediated TGF- $\beta$ 2 signaling to identify data-consistent mechanisms and assumptions needed to replicate in vitro BG behavior.

To establish minimal requirements for our BG and receptor signaling simulation, we relied on a combination of quantitative and qualitative BG observations for model evaluation. The evaluation criteria are based on observations from specific experimental results previously published to discriminate BG function. The evaluation criteria for our BG models include: 1) BG increases signal production in TGF- $\beta$ 2 to a greater degree than TGF- $\beta$ 1/3 (15), 2) BG recovers TGF- $\beta$ 2 signaling to levels comparable with TGF- $\beta$ 1/3 ligands (15), and 3) BG can act as a dual modulator of TGF- $\beta$ 2 signaling in a concentration-dependent manner (35). The criteria will be evaluated conservatively. For criterion 1, the tetramer signal levels in simulations with and without BG will be compared. If the ratio of BG-induced signal to BG-independent signal is greater for TGF- $\beta$ 2 than TGF- $\beta$ 1/3 these criteria will be considered met. For criterion 2, the recovery of TGF- $\beta$ 2 signaling to 50% or greater

of TGF- $\beta$ 1/3 signaling will be considered valid, although higher degrees of recovery beyond the threshold are better. The third evaluation criteria has both a strong experimental and theoretical footing and therefore is a reasonable BG behavior to expect. The most notable experimental evidence supporting this statement comes from studies that showed that membrane-bound BG, not the membrane-shed form reported by others (36–38), acts as an antagonist of TGF- $\beta$  signaling in certain cell lines (35). Theoretically, a coreceptor that sequesters ligand from the extracellular environment to present it to the signaling receptors for binding has the ability to act as a competitive inhibitor at high concentrations. Thus, BG is expected to behave in a biphasic manner, where it potentiates receptor complex assembly and signaling at moderate concentrations, but becomes inhibitory at high concentrations. This type of biphasic effect was demonstrated in 2012 with the BMP coreceptor, CV-2 (39,40), but has also been reported for endoglin, another coreceptor of the TGF- $\beta$  family that is homologous to the BG that promotes the signaling of the TGF- $\beta$  family ligands,

BMP-9 and BMP-10 (41). These criteria will be considered met if at any point the increase in BG concentration leads to decreased tetramer production.

### Membrane localization

One of the most important considerations for computational models of this system is to accurately account for membrane localization of the signaling receptors and nonsignaling coreceptors through a surface enhancement factor (SEF). The SEF accounts for local increases in concentration and access of interacting receptors, thereby enhancing second-order reactions that occur on the cell membrane. Typically, there are two sequential resistances for a binding reaction between two components: the transport-limited step and the reaction-limited step. The first advantage of reactions occurring on a surface or a cell membrane, as opposed to in free solution, is that the reactions are essentially two-dimensional after the initial binding event, removing a complete degree of freedom through a process known as reduction of dimensionality. Although diffusional transport of a membrane-bound receptor might be slower relative to free solution, the reduced dimension increases the probability of contacting the partner. This can be modeled by an effective decrease in the dissociation constants and applies equally to all surface-localized reactions (42). Therefore, reactions that take place between two membrane-bound macromolecules will have an increased favorability in comparison with a reaction where an extracellular signaling molecule has to find and favorably orient itself with respect to a transmembrane protein (reactions 1, 2, and 13 in Fig. 1 C). Specific reasoning for quantifying the SEF value can be found in section S3.

### Simulations that exclude BG

We first analyzed the viability of the three receptor recruitment models (NRR, SRR, and TRR) with all three TGF- $\beta$  ligands, but in the absence of BG. We evaluated the biological relevancy of each model by calculating a RMSE between models to experimental signaling data in cell lines with no BG (15) (supporting material). Lower RMSE values indicate that the simulated data are more representative of experimental signaling behavior when no BG is present.

The known and unknown parameters, starting conditions that affect the model output, in the no BG simulations were similar across all three ligand types ( $\beta$ 1/2/3) and across two of the receptor complex assembly models (NRR and SRR). The known parameters for the first simulations were ligand concentration and receptor concentration. The specific ligand concentrations selected enabled comparison of simulated data to experimental data (15). The starting receptor concentration selected, 160 nM, was the median TGF- $\beta$  receptor level found across a wide range of cell lines reported in the literature. The values reported as receptors per cell

were converted to concentration with volume calculations, as described in supporting material (43). Equimolar concentrations for T $\beta$ R1 and T $\beta$ R2 were used in our simulations based on previous studies (44). To ensure model consistency and integrity, a range of receptor concentrations, 100–250 nM, was tested to determine the effect of this parameter on signal performance.

With the biophysical data available in literature, there is only one unknown parameter for each ligand type in the NRR and SRR models. The unknown parameter is the absolute forward and reverse rate constants of TGF- $\beta$ 2 reaction 1 (including homologous reactions, see supporting material), and TGF- $\beta$ 1 and TGF- $\beta$ 3 reaction 2 (including homologous reactions, see supporting material). While the value of the dissociation constant for each reaction is known, the specific forward and reverse rates are not known. To test the impact of these default values on the RMSE calculation, we performed a local sensitivity analysis on the forward and reverse binding steps by simultaneously increasing their values between 1- and 500-fold. The default rates were curated based on similar reactions with measured forward and reverse binding steps and were increased to relevant ranges found in the literature. Simultaneously increasing the fold change in the forward and reverse binding steps preserved the experimentally measured dissociation constant and allowed us to determine the impact of changing the absolute rates on the RMSE calculations. As shown in Fig. 2 A, increasing the fold change value of the absolute rates to ranges that were observed in literature did not improve model fit for either the NRR or SRR model across a range of receptor concentrations. Furthermore, decreasing the absolute rate values to different degrees between the three ligand types did not lead to an appreciable change in individual model fitness as measured by the RMSE calculations. For example, in the NRR model, decreasing TGF- $\beta$ 1/3 reaction 2, and other homologous reactions, by 5-fold while decreasing TGF- $\beta$ 2 reaction 1, and other homologous reactions, by 500-fold did not appreciably affect the RMSE analysis (Fig. S1). Due to the minimal impact of changing the absolute rates for both models, the magnitude of the absolute rates chosen were the starting default values (Fig. 2 A, blue line). For both models, changing the default receptor concentration of 160 nM minimally affected the signaling pattern as shown in Fig. 2 A. The results of the local sensitivity analysis for receptor concentration supported the selection of our starting receptor concentration value.

The second simulation tested the accuracy of the TRR model when no BG was present. The known parameters for this simulation, ligand and receptor concentration, were maintained from the first simulation. The unknown parameters were the degree of receptor recruitment for reactions 5, 10, and 12 (Fig. 1 C) and the rates for these reactions. Like the first simulation, decreasing the absolute values of the rates while preserving the dissociation rate

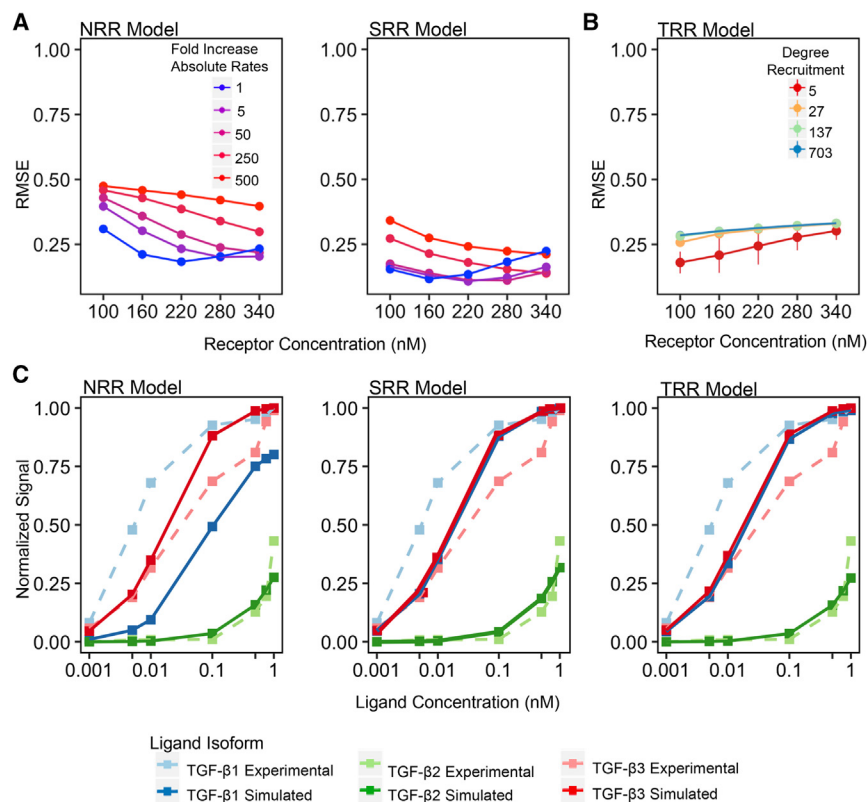

**FIGURE 2** Results of simulated models vs. published data and parameter selection when no BG is present. (A) Changing the value of the default receptor concentration, 160 nM, and the default absolute rates (*blue line*) while having a uniform dissociation constant (on-rate/off-rate ratio), does not improve the RMSE value for the NRR and SRR models. (B) The degree of recruitment (*red to blue lines*) with the best-fit for the hypothesized receptor recruitment of T $\beta$ R $\beta$ II by T $\beta$ R $\beta$ I was approximately fivefold. (C) With the predetermined SEF value of 50 and receptor concentration of 160 nM across all models, the “best-fit” simulations (*solid lines*) are able to obtain results similar to experimental data (*dotted lines*) (Cheifetz et al. (15)). To see this figure in color, go online.

constants did not significantly change the RMSE values. Fig. 2 B shows the effect of increasing the degree of recruitment in the TRR model on the RMSE analysis. The bars at each point represent the minimal impact of changing absolute rates. The degree of recruitment to best fit the experimental data is roughly 5 (Figs. 2 B and S3). This value characterizes the degree of increased favorability that a ligand-bound T $\beta$ R $\beta$ I has on recruiting T $\beta$ R $\beta$ II to the ligand complex. With the default values used for our unknown parameters in all three receptor recruitment models, there was no appreciable change in the RMSE value when the equimolar assumption for T $\beta$ R $\beta$ II and T $\beta$ R $\beta$ I was relaxed (Fig. S4). Therefore, a receptor concentration of 160 nM for T $\beta$ R $\beta$ I and T $\beta$ R $\beta$ II was maintained for further computations and should be assumed unless otherwise mentioned.

The parameter sets used for Fig. 2 C represent a good solution for each model at a receptor concentration of 160 nM, SEF of 50, and default absolute rate values with similar magnitudes to the absolute rates determined in SPR experiments. All three models can produce results that recapitulate TGF- $\beta$ 2 signaling patterns with no BG present; but, relative to each other, the SRR and TRR models produce a better fit to the experimental data. TGF- $\beta$ 1 and TGF- $\beta$ 3 were also modeled as further validation of the working assumptions in each model. Although they are not the focus of our paper, they further validate our simulations by having similar

signaling patterns in the SRR and TRR models, as the kinetic rates for each are very similar. As predicted, the NRR model underperforms in reproducing TGF- $\beta$ 1 and TGF- $\beta$ 3 behavior, likely due to the lack of receptor recruitment present in the other models.

### Simulations that include BG

We added BG to the simulations to continue our modeling of TGF- $\beta$ 2 signaling. We evaluated the biological relevancy of each model by calculating a RMSE between models to experimental signaling data in cell lines with BG (15) (supporting material), and by comparison with the evaluation criteria of BG behaviors reported in the literature and criteria for model evaluation described above (35,39,40).

The results shown in Fig. 3 A depict how effective BG is in each model at enhancing TGF- $\beta$ 2 signal and show the percent of tetramer produced out of the signaling species and TGF- $\beta$ 2:BG:T $\beta$ R $\beta$ II:T $\beta$ R $\beta$ I. The different points for each model represent the parameter sets across a range of ligand and BG concentrations tested for the three models. In the SRR model the data indicate a trade-off between the amount of BG-induced signal increase and the percent tetramer produced; this phenomenon is an artifact of very low tetramer production, which causes high fold change but low absolute levels of BG-induced signaling.

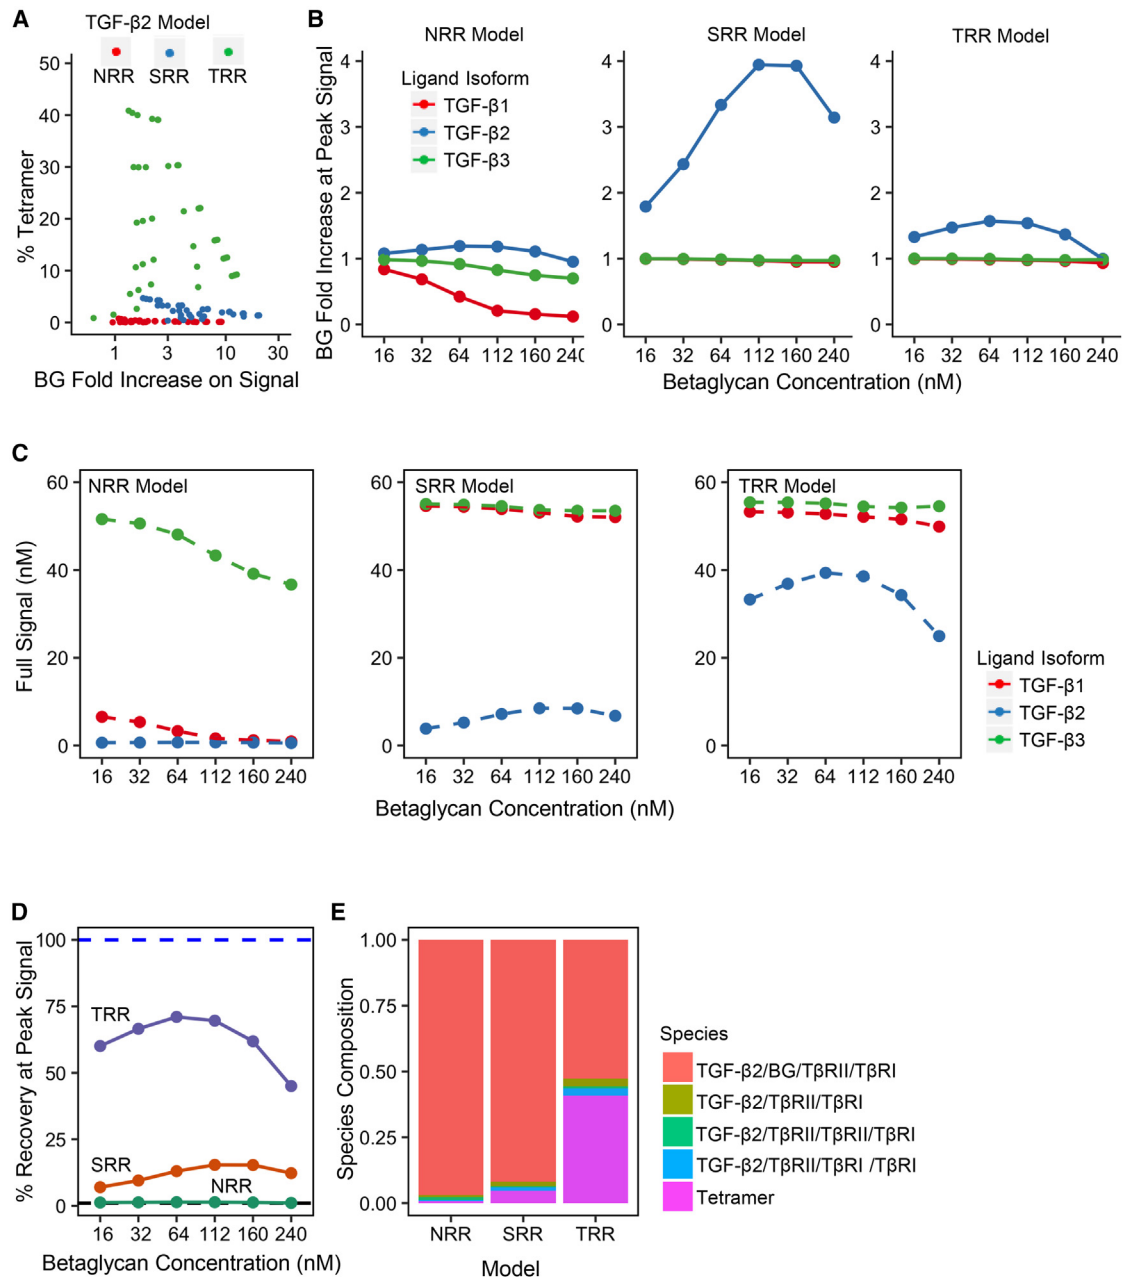

**FIGURE 3** Model performance in simulations with betaglycan present. (A) The parameter sets with an SEF of 50 and a receptor concentration of 160 nM (colored dots) for each TGF- $\beta$ 2 model are displayed together. (B) The signaling enhancement of the three ligand isoforms by BG across the three models was greater in the TGF- $\beta$ 2 (blue line) system than TGF- $\beta$ 1/ $\beta$ 3 (green and red lines) systems. The data were normalized to the amount of signal produced in each model with no BG present; therefore, the black dotted horizontal line represents no increase in signal by adding BG. (C) The absolute signaling concentrations (dashed lines) for the three ligand systems (same coloring as B) across the three models are shown. The NRR model produced almost no TGF- $\beta$ 2 signal and the TRR model produced two times more TGF- $\beta$ 2 signal than the SRR model. (D) When BG was added (x axis), the TRR model at 75% recovery, was the best at recapitulating TGF- $\beta$ 2 signal to levels comparable with TGF- $\beta$ 3 signal (blue dashed line). Higher concentrations of BG inhibit TGF- $\beta$ 2 signal as seen by the bell-shaped curves on the graph. (E) TGF- $\beta$ 2 species composition of the signaling species and TGF- $\beta$ 2/BG/T $\beta$ RII/T $\beta$ RI across each model. The TRR model produced more tetramer (bright pink) than the NRR and SRR models, and the major species in all models is TGF- $\beta$ 2/BG/T $\beta$ RII/T $\beta$ RI (light red). To see this figure in color, go online.

The results in Fig. 3 B show that all three models meet the first and third evaluation criteria of BG behavior: there is a greater positive impact on TGF- $\beta$ 2 signal (blue line) than TGF- $\beta$ 1/ $\beta$ 3 (red/green lines) and BG can act as a dual modulator of signal in a concentration-dependent manner. The

graphs are each normalized to signaling levels with no BG present. The SRR model produces the largest fold change out of the three models due to normalizing technique used, but produces less absolute signal than the TRR model (Fig. 3 C). Fig. 3 D shows how well each model meets the

second and third evaluation criteria of BG behaviors: BG produces a TGF- $\beta$ 2 signal that is comparable with TGF- $\beta$ 3 signal and BG can act as a dual modulator of signal in a concentration-dependent manner. As demonstrated by a BG concentration of 240 nM, all TGF- $\beta$ 2 models experience a biphasic effect whereby potentiation of signaling by BG is mediated most effectively by intermediate concentrations, and high concentrations of BG actually inhibit signaling. The behavior of BG in the TRR model performs the best at potentiating the TGF- $\beta$ 2 signal, achieving roughly 75% of TGF- $\beta$ 3 signaling at a BG concentration of about 100 nM. BG, however, provides less than 20% recovery in the SRR model and almost zero percent recovery in the NRR model. A rescue closer to 100% in TGF- $\beta$ 2 signaling is expected because experimental data show that BG fully rescues TGF- $\beta$ 2 signal to TGF- $\beta$ 1 and TGF- $\beta$ 3 signaling levels (15).

To investigate the causes of suboptimal TGF- $\beta$ 2 signal rescue, we examined the concentrations of all species at steady state to obtain a better understanding of the behavior of our models. Fig. 3 E is a breakdown of the signaling species and TGF- $\beta$ :BG:T $\beta$ RII:T $\beta$ RI composition at steady state for each model. None of the models produce greater than 50% T $\beta$ RI:T $\beta$ RII heterotetramer (*bright pink*) and the major species in all of the models is TGF- $\beta$ :BG:T $\beta$ RII:T $\beta$ RI. This is at odds with the proposal that the TGF- $\beta$ :BG:T $\beta$ RII:T $\beta$ RI complex is transient, thus lowly populated (27). This inconsistency may on the one hand indicate that the TGF- $\beta$ :BG:T $\beta$ RII:T $\beta$ RI complex accumulates on the cell membrane and is not transient as previously thought. If this species is not transient, then allowing this species to contribute to signal may improve the suboptimal signal recovery. It is possible on the other hand that the kinetic rates for the dissociation of the TGF- $\beta$ :BG:T $\beta$ RII:T $\beta$ RI complex inaccurately capture the predicted transience of this intermediate species. Since no kinetic rates were reported for disassociation of BG from the TGF- $\beta$ :BG:T $\beta$ RII:T $\beta$ RI complex, the starting kinetic rate for the dissociation of the BG quaternary species was the dissociation of the BG-ZP domain from free ligand. This inferred dissociation constant may inaccurately represent the transience of the BG quaternary species. Due to the ambiguity surrounding the transience and signaling capability of the BG quaternary species, the assumption that this species is transient is tested with the following sections.

### Testing assumption: BG quaternary species is transient

Previously, we did not allow the TGF- $\beta$ :BG:T $\beta$ RII:T $\beta$ RI complex to signal based on the assumption that it was a transient species. If we no longer apply the transient assumption to our models then the TGF- $\beta$ :BG:T $\beta$ RII:T $\beta$ RI complex (Fig. 4 A, *species circled in red*) would be able to contribute

to overall signal based on the earlier studies, which showed that T $\beta$ RI:T $\beta$ RII heterodimers are capable of signaling (8). When we allowed this species to contribute to signal, we observed, across an extremely wide combination of ligand concentrations and BG concentrations, that BG could not act as a dual modulator of signal in a concentration-dependent manner (Fig. 4 B) since BG no longer had an optimal ratio of BG to signaling receptors for TGF- $\beta$ 2 signal potentiation. These results demonstrate that if TGF- $\beta$ 2:BG:T $\beta$ RII:T $\beta$ RI is not a transient species it should not contribute to signal to recapitulate the ability of BG to promote and reduce TGF- $\beta$ 2 signaling in a concentration-dependent manner. If the transient hypothesis is true, then the inconsistent accumulation of TGF- $\beta$ :BG:T $\beta$ RII:T $\beta$ RI species may be a reason for the suboptimal TGF- $\beta$ 2 signal recovery. A screen for the dissociation of the BG-ZP domain in the TGF- $\beta$ :BG:T $\beta$ RII:T $\beta$ RI species (reaction 17) was performed to test if the starting SPR kinetics are a reason for the impeded rescue.

### Effects of increasing BG-ZP dissociation

To further investigate how the two BG domains work together to enhance TGF- $\beta$ 2 signal recovery, we increased the dissociation of the BG-ZP domain within a range of 1–500. This allowed us to determine if reducing the abundance of TGF- $\beta$ 2:BG:T $\beta$ RII:T $\beta$ RI (Fig. 4 A, *species circled in red*) could lead to the formation of more T $\beta$ RI:T $\beta$ RII heterotetramer, and therefore increase BG potentiation of TGF- $\beta$ 2 signaling.

The NRR model can produce results where the TGF- $\beta$ 2:BG:T $\beta$ RII:T $\beta$ RI species is less than 50% of the signaling species, but this requires 100-fold or greater increases in BG-ZP dissociation (Fig. 4 C). The SRR and TRR models, in contrast, produce significantly less TGF- $\beta$ 2:BG:T $\beta$ RII:T $\beta$ RI and abundant T $\beta$ RI:T $\beta$ RII heterotetramer, even with modest increases in BG-ZP dissociation (Fig. 4 C). Compared with the SRR and TRR models, the NRR model performs poorly at reducing the abundance of TGF- $\beta$ 2:BG:T $\beta$ RII:T $\beta$ RI species. The NRR model was therefore left out of further analyses due to its substandard performance and for ease of comparison between the SRR and TRR models. For each model, we selected a fold increase in BG-ZP dissociation, which produced at least 90% of the maximum signal for each model (100- and 30-fold increase for the SRR and TRR models, respectively). Selecting a fold increase in BG-ZP dissociation beyond the selected value minimally affects the signaling results of each model. This idea is visualized by the logarithmic shaped curve in species composition graph as the fold change in BG-ZP dissociation increases (Fig. 4 C).

Minimally increasing the BG-ZP dissociation in the SRR and TRR models led to a higher percent recovery in TGF- $\beta$ 2 signal. Using the same logic in Figs. 3 D and 4 D shows the TRR model can now achieve greater than 95% recovery of



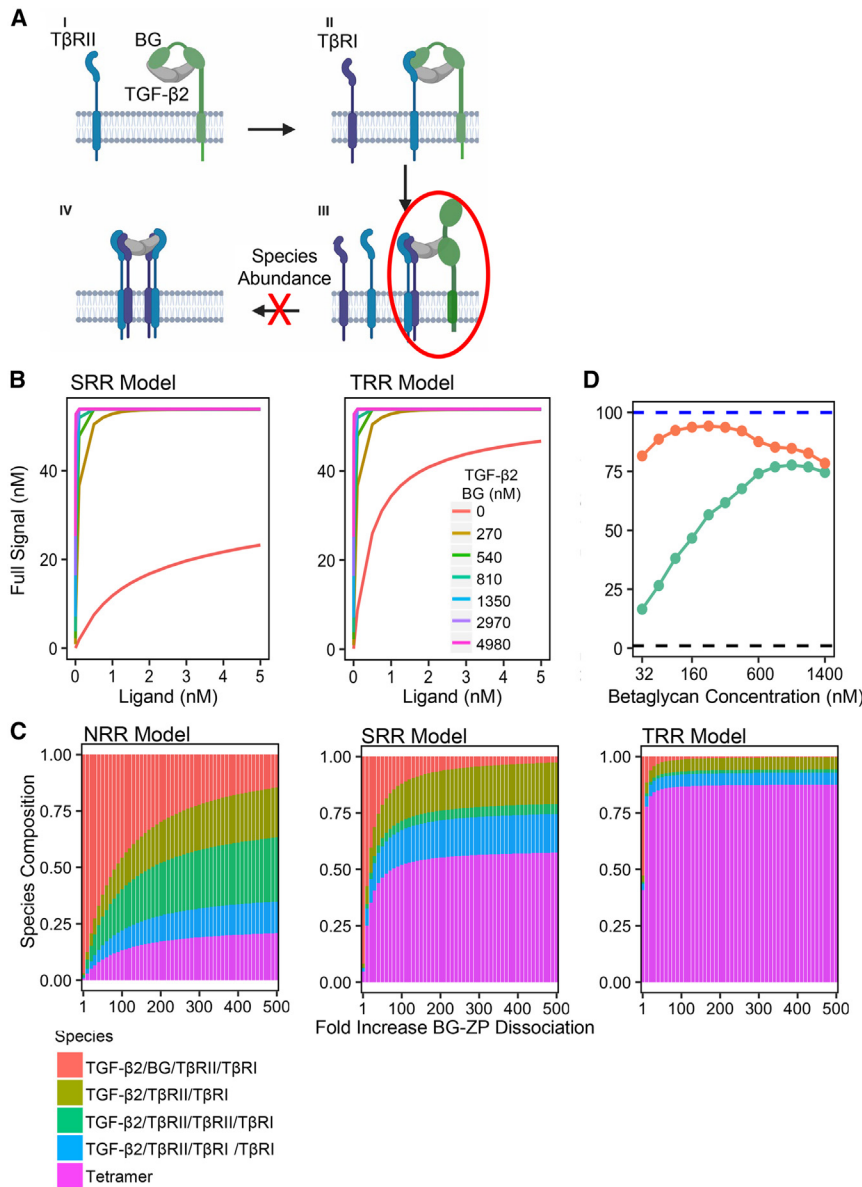

**FIGURE 4** TGF-β2/BG/TβRII/TβRI inconsistency solved by small increase in BG-ZP dissociation to ligand complex. TRR model outperforms other models in recapitulating betaglycan behavior. (A) A depiction of the inconsistency previously found where TGF-β2/BG/TβRII/TβRI complex (circled in red) was the most prevalent species out of all the species created. This abundance was hypothesized to inhibit the formation of signaling species. (B) When TGF-β2/BG/TβRII/TβRI species is not required to be transient and contributes to signal, there is no biphasic effect across a wide range of ligand concentrations (x axis) and BG concentrations (colored lines), 0.001 to 5 nM and 0 to 4980 nM, respectively. (C) A species composition analysis at peak signal, with a receptor concentration of 160 nM, and a SEF of 50, shows minimal increases in BG-ZP dissociation and reduces the abundance of TGF-β2/BG/TβRII/TβRI species in the SRR and TRR models. NRR model requires a larger increase in BG-ZP dissociation compared with SRR and NRR models. The BG-ZP dissociation fold increase selected for each model was when increasing the BG-ZP dissociation did not impact the signaling results with the parameter ranges tested. This behavior is reached when 90% of the maximum signal is achieved. (D) TGF-β2 signal in the TRR model (orange line) can recover greater than 95% of TGF-β3 signal (blue dashed line) while the TGF-β2 signal in the SRR model (green line) can recover roughly 75% of TGF-β3 signal. To see this figure in color, go online.

peak signal produced by TGF-β3 while the SRR model produces roughly 75% with a wide range of BG concentrations tested (32–1400 nM). Comparing Figs. 3 D and 4 D, the signal recovery levels are higher for both the SRR and TRR models when TGF-β2:BG:TβRII:TβRI complex is predicted to be transient and the dissociation of BG is minimally increased. Thus, these results suggest that BG-ZP quickly dissociates when TβRI is bound and the TGF-β2:BG:TβRII:TβRI species does not signal or has a minor contribution to the overall signal. To test this experimentally, it will be important to further measure the impact of BG on TGF-β signaling under various amounts of BG overexpression.

The mechanism proposed by Villarreal et al. (27) with published rates from SPR experiments does not meet our evaluation criteria if the TGF-β2:BG:TβRII:TβRI species

is allowed to contribute to signal because BG no longer acts as a dual modulator of signal, regardless of concentration. However, if the disassociation of the TGF-β2:BG:TβRII:TβRI complex is increased, and thus the complex becomes more transient, our results demonstrate greater TGF-β2 signal rescue. Comparing two other system behaviors, percent tetramer and BG-induced signal enhancement, the models that include an increase in BG-ZP dissociation from the ligand-receptor complex outperform models with the starting SPR data (Fig. 5 A). Fig. 5 B summarizes the effect of increasing BG-ZP dissociation on model performance at varying concentrations of BG (red to blue lines). This RMSE analysis not only compares the signaling differences between TGF-β2 with BG to TGF-β3 without BG, but also incorporates the expected signaling behavior of TGF-β1 and β3 systems with and

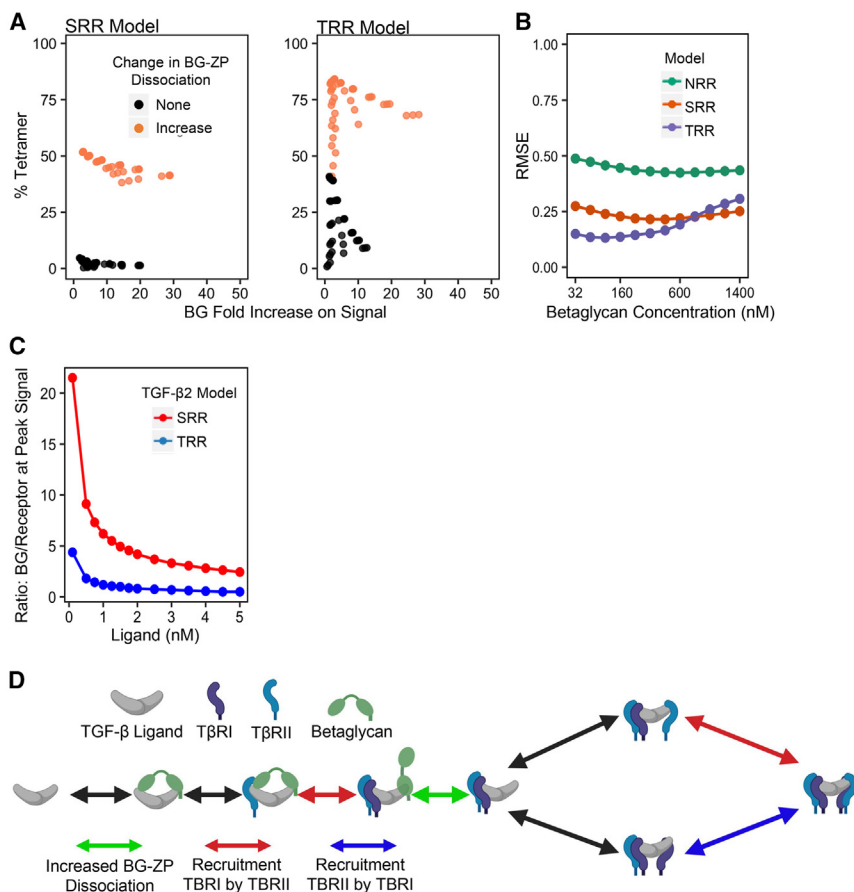

**FIGURE 5** Distinguishing between models and BG-mediated TGF- $\beta$ 2 signal hypotheses. (A) Across a broad range of parameter sets, almost any increase in the dissociation of BG-ZP (*orange points*) outperforms the original parameter sets with no increase in BG-ZP dissociation (*black points*). (B) When requiring the TGF- $\beta$ 2/BG/T $\beta$ RII/T $\beta$ RI species to be transient, the RMSE analysis captures how the models measure up to no BG and BG system requirements in all three ligand systems. The NRR model was incorporated again to show effectiveness of adding cooperative receptor recruitment into the TGF- $\beta$  receptor signaling complex formation in the presence and absence of BG. Each model shows BG's inhibitory effect on TGF- $\beta$ 's signal by the concave shape of the graphs. Across a wide range of BG concentrations (*x* axis) the TRR model recapitulates no BG and BG behavior the best in all three ligand systems until BG inhibits TGF- $\beta$  signal causing the RMSE to increase. (C) A testable distinction between the SRR and TRR models was found in the BG to receptor ratio required to achieve the biphasic effect on TGF- $\beta$ 2 signal by BG. Across a wide range of ligand concentrations, 0.001–5 nM, the SRR model (*red points*) needs 4.7–4.9 times more BG to induce the biphasic effect than the TRR model (*blue points*). (D) Zoomed-in diagram of the receptor complex assembly that highlights the final conclusions. The red and blue arrows represent the types of cooperative receptor recruitment that is hypothesized to be present and the green arrow indicates that an increase in the dissociation of TGF- $\beta$ 2/BG/T $\beta$ RII/T $\beta$ RI improves model performance under certain conditions. To see this figure in color, go online.

without BG. The TRR model once again outperforms the SRR model at recapitulating the BG behaviors. Although the SRR model is supported by SPR measurements, it is nonetheless possible that other forms of cooperative receptor recruitment are present in the TGF- $\beta$  system (8,12,13). A symmetric form of recruitment, as exemplified by the TRR model, better facilitates the formation of the heterotetramer which follows the pattern in other protein systems (31). The TRR model also outperforms the SRR model on almost all evaluation criteria of BG behavior. The simulations presented therefore suggest that the TRR model is the most realistic model tested. To enable experimentally testing of the conclusions presented in this paper, further differences between the SRR and TRR models were investigated, as summarized in the section that follows.

### Investigating model differences

One obvious difference between the SRR and TRR models is the varying BG concentrations needed to induce an inhibitory effect on signal (Fig. 4 D). Therefore, we sought to determine the BG to signaling receptor (T $\beta$ RI and T $\beta$ RII) ratio that is required to produce a biphasic effect under the assumption that TGF- $\beta$ 2:BG:T $\beta$ RII:T $\beta$ RI is transient with

a model-specific increase in the BG-ZP dissociation (Fig. 4 B). With a similar ligand concentration in each system, the SRR model needed a 2.44:21.5 BG to T $\beta$ RI/T $\beta$ RII ratio to induce a biphasic effect, whereas the TRR model required a 0.50:4.38 BG to T $\beta$ RI/T $\beta$ RII ratio to induce a biphasic effect (Fig. 5 E). Thus, the SRR model needed a 4.7–4.9 times greater concentration of BG to receptor ratio than the TRR model. Experiments that seek to identify the molar ratios of receptors and BG will provide useful data to discriminate between these alternatives.

### DISCUSSION

The role of BG in selectively facilitating TGF- $\beta$ 2 signaling has been heavily investigated, but the mechanism is still not fully understood. In the absence of BG, physiological levels of TGF- $\beta$ 2 are insufficient to produce efficient signal to initiate targeted gene expression, leading to a disruption of developmental processes (21). The focus of this work was to identify conditions for selective enhancement of TGF- $\beta$ 2 signaling and provide support for additional receptor binding cooperativity that has been difficult to test with experimental tools currently available. Through modeling of the kinetic mechanism, it appears that BG

**TABLE 1** Model evaluation summary

| Model evaluation criteria                                                                        | NRR model                                                                                                  | SRR model                                                                                                   | TRR model                                                                                                     |
|--------------------------------------------------------------------------------------------------|------------------------------------------------------------------------------------------------------------|-------------------------------------------------------------------------------------------------------------|---------------------------------------------------------------------------------------------------------------|
| BG increases signal production in TGF- $\beta$ 2 to a greater degree than TGF- $\beta$ 1/3       | passes (Fig. 3 B)                                                                                          | passes (Fig. 3 B)                                                                                           | passes (Fig. 3 B)                                                                                             |
| BG recovers TGF- $\beta$ 2 signaling to levels comparable with TGF- $\beta$ 1/ $\beta$ 3 ligands | fails: BG-mediated TGF- $\beta$ 2 signaling is only 0–3% of TGF- $\beta$ 1/ $\beta$ 3 signaling (Fig. 3 D) | fails: BG-mediated TGF- $\beta$ 2 signaling is only 7–19% of TGF- $\beta$ 1/ $\beta$ 3 signaling (Fig. 3 D) | passes: BG-mediated TGF- $\beta$ 2 signaling is only 47–75% of TGF- $\beta$ 1/ $\beta$ 3 signaling (Fig. 3 D) |
| BG can act as a dual modulator of TGF- $\beta$ 2 signaling in a concentration-dependent manner   | passes (Fig. 3 B)                                                                                          | passes (Fig. 3 B)                                                                                           | passes (Fig. 3 B)                                                                                             |

binding to TGF- $\beta$ 2 ligand through two domains effectively potentiates TGF- $\beta$ 2 signal and symmetric cooperative receptor recruitment between T $\beta$ RI and T $\beta$ RII best explains the experimental data (TRR model).

Computational modeling demonstrated that the proposed BG-mediated potentiation of TGF- $\beta$ 2 signaling with inferred SPR rates produced suboptimal signal rescue, with none of the models producing more than 75% signal recovery. This indicated that the transient hypothesis of the TGF- $\beta$ 2:BG:T $\beta$ RII:T $\beta$ RI species is correct, or there may be a more complex biological interaction taking place between the macromolecules that the inferred SPR data could not accurately represent. If the TGF- $\beta$ 2:BG:T $\beta$ RII:T $\beta$ RI species is allowed to signal, TGF- $\beta$ 2 signal recovery is increased, but there is no biphasic effect across a wide range of BG concentrations. Due to the inability of BG to act as a dual modulator of signal, we conclude that BG quaternary species is likely transient, and thus its overall contribution to signaling is limited.

When the dissociation of the TGF- $\beta$ 2:BG:T $\beta$ RII:T $\beta$ RI species was increased, through a moderate increase in the BG-ZP dissociation rate constant, the TRR model reached about 95% rescue of the TGF- $\beta$ 2 signal, while the SRR model reached approximately 75% rescue. The improvement in TGF- $\beta$ 2 signal rescue from minimal increases in BG-ZP dissociation in the TRR model highlights the importance of this step to predicting model performance. With these findings, it is possible that the binding of T $\beta$ RI to the TGF- $\beta$ :BG:T $\beta$ RII complex increases the dissociation of the BG-ZP domain through steric interactions or a conformational change. This interaction cannot be easily measured in real time with experimental tools available today, but our models identified the importance of this dissociation constant in determining model performance. These results support the hypothesis that there may be a more complex biological interaction taking place at this reaction than originally inferred.

The TRR model with a minor increase in BG-ZP dissociation, meets all TGF- $\beta$  predicted behavior with and without BG present, whereas the SRR and NRR models do not (Table 1). The differences in the performance of the TRR, SRR, and NRR models indicate the importance of receptor-receptor interactions throughout the T $\beta$ RI:T $\beta$ RII

heterotetramer assembly pathway. Our modeling results favored the TRR model no matter the alteration in the BG mechanism. TRR's robust performance in meeting experimental data, suggests that T $\beta$ RI potentiation of T $\beta$ RII binding in later stages of T $\beta$ RI:T $\beta$ RII heterotetramer assembly greatly affect the performance of TGF- $\beta$  signaling behavior. Furthermore, the order of addition for the second pair of T $\beta$ RI:T $\beta$ RII to the TGF- $\beta$  homodimer may be nonspecific due to the increase in TGF- $\beta$  signaling performance following a minor increase in the binding affinity of T $\beta$ RI downstream. If the TRR model is operative, then the BG to receptor concentration ratio will be from 0.5 to 4.38, whereas the SRR model has a BG to receptor ratio of 2.44 to 21.5. This is a testable difference between the two systems that could be performed to determine if T $\beta$ RI does recruit T $\beta$ RII. Modeling alone does not disprove or prove a model but suggests that the TRR model should be further tested to determine estimated quantities relative to receptors in the system.

Even though BG's biphasic effect on TGF- $\beta$  signaling is heavily supported, no direct experiments have been performed to show that BG can act as a dual modulator of signal in a concentration-dependent manner. To test this statement in our evaluation criteria, BG can be titrated into a cell culture to determine if there is an optimal ratio of BG to signaling receptors that potentiates TGF- $\beta$ 2 signaling activity.

There are a few limitations of this study that present interesting potential avenues for future investigation. This study focused exclusively on the core components of the TGF- $\beta$  signaling system and did not consider the role of preformed receptor complexes, or the broader involvement of other membrane-bound TGF- $\beta$  coregulators such as FKBP12 (45,46). In addition, the models in the present study are deterministic rather than stochastic and therefore do not investigate issues of noise or temporal effects that may have important roles in the signaling dynamics of the TGF- $\beta$  system.

## SUPPORTING MATERIAL

Supporting material can be found online at <https://doi.org/10.1016/j.bpj.2023.02.030>.

## AUTHOR CONTRIBUTIONS

M.I. planned and carried out the simulations and analyzed the data. A.M. designed the model and the computational framework. A.P.H. and D.M.U. designed and directed the project.

## ACKNOWLEDGMENTS

This research was supported in part by the NIH grant R01GM132501 awarded to D.M.U. and NIH grant R01GM058670 awarded to A.P.H.

## DECLARATION OF INTERESTS

The authors declare no competing interests.

## REFERENCES

- Hinck, A. P. 2012. Structural studies of the TGF- $\beta$ s and their receptors - insights into evolution of the TGF- $\beta$  superfamily. *FEBS Lett.* 586:1860–1870.
- Hinck, A. P., T. D. Mueller, and T. A. Springer. 2016. Structural biology and evolution of the TGF- $\beta$  family. *Cold Spring Harb. Perspect. Biol.* 8, a022103.
- Hata, A., and Y. G. Chen. 2016. TGF- $\beta$  signaling from receptors to Smads. *Cold Spring Harb. Perspect. Biol.* 8, a022061.
- Massagué, J., and D. Wotton. 2000. Transcriptional control by the TGF- $\beta$ /Smad signaling system. *EMBO J.* 19:1745–1754.
- Laiho, M., F. M. Weis, ..., J. Massagué. 1991. Responsiveness to transforming growth factor- $\beta$  (TGF- $\beta$ ) restored by genetic complementation between cells defective in TGF- $\beta$  receptors I and II. *J. Biol. Chem.* 266:9108–9112.
- Wrana, J. L., L. Attisano, ..., J. Massagué. 1992. TGF  $\beta$  signals through a heteromeric protein kinase receptor complex. *Cell.* 71:1003–1014.
- Moustakas, A., H. Y. Lin, ..., H. F. Lodish. 1993. The transforming growth factor  $\beta$  receptors types I, II, and III form hetero-oligomeric complexes in the presence of ligand. *J. Biol. Chem.* 268:22215–22218.
- Huang, T., L. David, ..., A. P. Hinck. 2011. TGF- $\beta$  signalling is mediated by two autonomously functioning TbetaRI:TbetaRII pairs. *EMBO J.* 30:1263–1276.
- De Crescenzo, G., C. S. Hinck, ..., A. P. Hinck. 2006. Three key residues underlie the differential affinity of the TGF $\beta$  isoforms for the TGF $\beta$  type II receptor. *J. Mol. Biol.* 355:47–62.
- Hart, P. J., S. Deep, ..., A. P. Hinck. 2002. Crystal structure of the human TbetaR2 ectodomain–TGF- $\beta$ 3 complex. *Nat. Struct. Biol.* 9:203–208.
- Zúñiga, J. E., J. C. Groppa, ..., A. P. Hinck. 2005. Assembly of TbetaRI:TbetaRII:TGF $\beta$  ternary complex in vitro with receptor extracellular domains is cooperative and isoform-dependent. *J. Mol. Biol.* 354:1052–1068.
- Groppe, J., C. S. Hinck, ..., A. P. Hinck. 2008. Cooperative assembly of TGF- $\beta$  superfamily signaling complexes is mediated by two disparate mechanisms and distinct modes of receptor binding. *Mol. Cell.* 29:157–168.
- Radaev, S., Z. Zou, ..., P. D. Sun. 2010. Ternary complex of transforming growth factor- $\beta$ 1 reveals isoform-specific ligand recognition and receptor recruitment in the superfamily. *J. Biol. Chem.* 285:14806–14814.
- Baardsnes, J., C. S. Hinck, ..., M. D. O'Connor-McCourt. 2009. TbetaR-II discriminates the high- and low-affinity TGF- $\beta$  isoforms via two hydrogen-bonded ion pairs. *Biochemistry.* 48:2146–2155.
- Cheifetz, S., H. Hernandez, ..., J. Massagué. 1990. Distinct transforming growth factor- $\beta$  (TGF- $\beta$ ) receptor subsets as determinants of cellular responsiveness to three TGF- $\beta$  isoforms. *J. Biol. Chem.* 265:20533–20538.
- Qian, S. W., J. K. Burmester, ..., A. B. Roberts. 1996. Binding affinity of transforming growth factor- $\beta$  for its type II receptor is determined by the C-terminal region of the molecule. *J. Biol. Chem.* 271:30656–30662.
- López-Casillas, F., J. L. Wrana, and J. Massagué. 1993. Betaglycan presents ligand to the TGF  $\beta$  signaling receptor. *Cell.* 73:1435–1444.
- López-Casillas, F., H. M. Payne, ..., J. Massagué. 1994. Betaglycan can act as a dual modulator of TGF- $\beta$  access to signaling receptors: mapping of ligand binding and GAG attachment sites. *J. Cell Biol.* 124:557–568.
- Mendoza, V., M. M. Vilchis-Landeros, ..., J. L. Montiel. 2009. Betaglycan has two independent domains required for high affinity TGF- $\beta$  binding: proteolytic cleavage separates the domains and inactivates the neutralizing activity of the soluble receptor. *Biochemistry.* 48:11755–11765.
- Esparza-Lopez, J., J. L. Montiel, ..., F. López-Casillas. 2001. Ligand binding and functional properties of betaglycan, a co-receptor of the transforming growth factor- $\beta$  superfamily. Specialized binding regions for transforming growth factor- $\beta$  and inhibin A. *J. Biol. Chem.* 276:14588–14596.
- Stenvers, K. L., M. L. Tursky, ..., H. J. Zhu. 2003. Heart and liver defects and reduced transforming growth factor  $\beta$ 2 sensitivity in transforming growth factor  $\beta$  type III receptor-deficient embryos. *Mol. Cell Biol.* 23:4371–4385.
- Sanford, L. P., I. Ormsby, ..., T. Doetschman. 1997. TGF $\beta$ 2 knockout mice have multiple developmental defects that are non-overlapping with other TGF $\beta$  knockout phenotypes. *Development.* 124:2659–2670.
- Kim, S. K., M. J. Whitley, ..., A. P. Hinck. 2019. Structural Adaptation in its orphan domain engenders betaglycan with an alternate mode of growth factor binding relative to endoglin. *Structure.* 27:1427–1442.e4.
- Lin, S. J., Y. Hu, ..., T. S. Jardetzky. 2011. Structure of betaglycan zona pellucida (ZP)-C domain provides insights into ZP-mediated protein polymerization and TGF- $\beta$  binding. *Proc. Natl. Acad. Sci. USA.* 108:5232–5236.
- Diestel, U., M. Resch, ..., Y. A. Muller. 2013. Identification of a novel TGF- $\beta$ -binding site in the zona pellucida C-terminal (ZP-C) domain of TGF- $\beta$ -receptor-3 (TGFR-3). *PLoS One.* 8, e67214.
- Saito, T., M. Bokhove, ..., L. Jovine. 2017. Structural basis of the human endoglin-BMP9 interaction: insights into BMP signaling and HHT1. *Cell Rep.* 19:1917–1928.
- Villarreal, M. M., S. K. Kim, ..., A. P. Hinck. 2016. Binding properties of the transforming growth factor- $\beta$  coreceptor betaglycan: proposed mechanism for potentiation of receptor complex assembly and signaling. *Biochemistry.* 55:6880–6896.
- Lopez, C. F., J. L. Muhlich, ..., P. K. Sorger. 2013. Programming biological models in Python using PySB. *Mol. Syst. Biol.* 9:646.
- Schmierer, B., A. L. Tournier, ..., C. S. Hill. 2008. Mathematical modeling identifies Smad nucleocytoplasmic shuttling as a dynamic signal-interpreting system. *Proc. Natl. Acad. Sci. USA.* 105:6608–6613.
- Zuniga, J. E., U. Ilangovan, ..., A. P. Hinck. 2011. The TbetaR-I prehelix extension is structurally ordered in the unbound form and its flanking prolines are essential for binding. *J. Mol. Biol.* 412:601–618.
- Chen, H., and M. L. Privalsky. 1995. Cooperative formation of high-order oligomers by retinoid X receptors: an unexpected mode of DNA recognition. *Proc. Natl. Acad. Sci. USA.* 92:422–426.
- Martin-Blanco, N., R. Blanco, ..., B. Alarcon. 2018. A window of opportunity for cooperativity in the T Cell Receptor. *Nat. Commun.* 9:2618.
- Rallabhandi, P., Q. M. Nhu, ..., S. N. Vogel. 2008. Analysis of proteinase-activated receptor 2 and TLR4 signal transduction: a novel paradigm for receptor cooperativity. *J. Biol. Chem.* 283:24314–24325.
- Henen, M. A., P. Mahlawat, ..., A. P. Hinck. 2019. TGF- $\beta$ 2 uses the concave surface of its extended finger region to bind betaglycan's ZP

- domain via three residues specific to TGF- $\beta$  and inhibin- $\alpha$ . *J. Biol. Chem.* 294:3065–3080.
35. Eickelberg, O., M. Centrella, ..., R. G. Wells. 2002. Betaglycan inhibits TGF- $\beta$  signaling by preventing type I-type II receptor complex formation. Glycosaminoglycan modifications alter betaglycan function. *J. Biol. Chem.* 277:823–829.
  36. Elderbroom, J. L., J. J. Huang, ..., G. C. Blobe. 2014. Ectodomain shedding of TbetaRIII is required for TbetaRIII-mediated suppression of TGF- $\beta$  signaling and breast cancer migration and invasion. *Mol. Biol. Cell.* 25:2320–2332.
  37. Huang, J. J., A. L. Corona, ..., G. C. Blobe. 2019. Increased type III TGF- $\beta$  receptor shedding decreases tumorigenesis through induction of epithelial-to-mesenchymal transition. *Oncogene.* 38:3402–3414.
  38. Velasco-Loyden, G., J. Arribas, and F. López-Casillas. 2004. The shedding of betaglycan is regulated by pervanadate and mediated by membrane type matrix metalloprotease-1. *J. Biol. Chem.* 279:7721–7733.
  39. Serpe, M., D. Umulis, ..., S. S. Blair. 2008. The BMP-binding protein Crossveinless 2 is a short-range, concentration-dependent, biphasic modulator of BMP signaling in *Drosophila*. *Dev. Cell.* 14:940–953.
  40. Karim, M. S., G. T. Buzzard, and D. M. Umulis. 2012. Secreted, receptor-associated bone morphogenetic protein regulators reduce stochastic noise intrinsic to many extracellular morphogen distributions. *J. R. Soc. Interface.* 9:1073–1083.
  41. Lastres, P., A. Letamendía, ..., C. Bernabéu. 1996. Endoglin modulates cellular responses to TGF- $\beta$  1. *J. Cell Biol.* 133:1109–1121.
  42. Karim, M. S., A. Madamanchi, ..., D. M. Umulis. 2021. Heterodimer-heterotetramer formation mediates enhanced sensor activity in a biophysical model for BMP signaling. *PLoS Comput. Biol.* 17, e1009422.
  43. Wakefield, L. M., D. M. Smith, ..., M. B. Sporn. 1987. Distribution and modulation of the cellular receptor for transforming growth factor- $\beta$ . *J. Cell Biol.* 105:965–975.
  44. Chung, S. W., F. L. Miles, ..., B. A. Ogunnaike. 2009. Quantitative modeling and analysis of the transforming growth factor beta signaling pathway. *Biophys. J.* 96:1733–1750.
  45. Huse, M., Y. G. Chen, ..., J. Kuriyan. 1999. Crystal structure of the cytoplasmic domain of the type I TGF  $\beta$  receptor in complex with FKBP12. *Cell.* 96:425–436.
  46. Ehrlich, M., O. Gutman, ..., Y. I. Henis. 2012. Oligomeric interactions of TGF- $\beta$  and BMP receptors. *FEBS Lett.* 586:1885–1896.

**Biophysical Journal, Volume 122**

**Supplemental information**

**Computational modeling of TGF- $\beta$ 2:T $\beta$ RI:T $\beta$ RII receptor complex assembly as mediated by the TGF- $\beta$  coreceptor betaglycan**

**Aasikiran Madamanchi, Michelle Ingle, Andrew P. Hinck, and David M. Umlis**

# Supplemental Figure S1

Minimal Effects in Decreasing Absolute Rates of Each Ligand System Independently

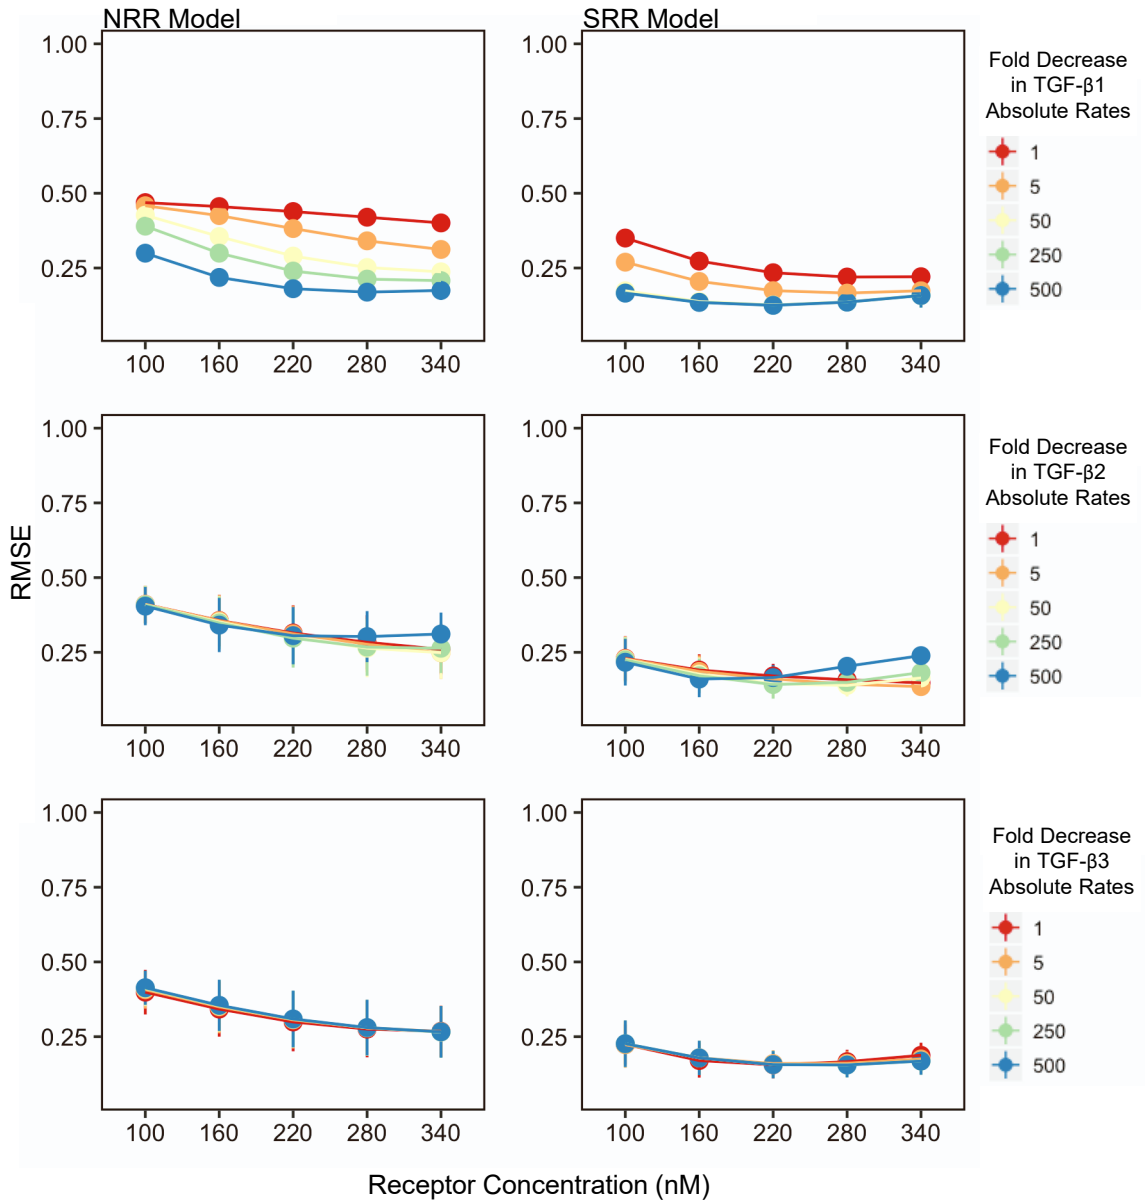

Supplement: mmc6.pdf [file mmc6.pdf]
