# Supplementary material
Source: PubMed Central journal article supplement (PMC10111353)

**Biophysical Journal, Volume 122**

**Supplemental information**

**Computational modeling of TGF- $\beta$ 2:T $\beta$ RI:T $\beta$ RII receptor complex assembly as mediated by the TGF- $\beta$  coreceptor betaglycan**

**Aasikiran Madamanchi, Michelle Ingle, Andrew P. Hinck, and David M. Umlis**

# Supplemental Figure S1

Minimal Effects in Decreasing Absolute Rates of Each Ligand System Independently

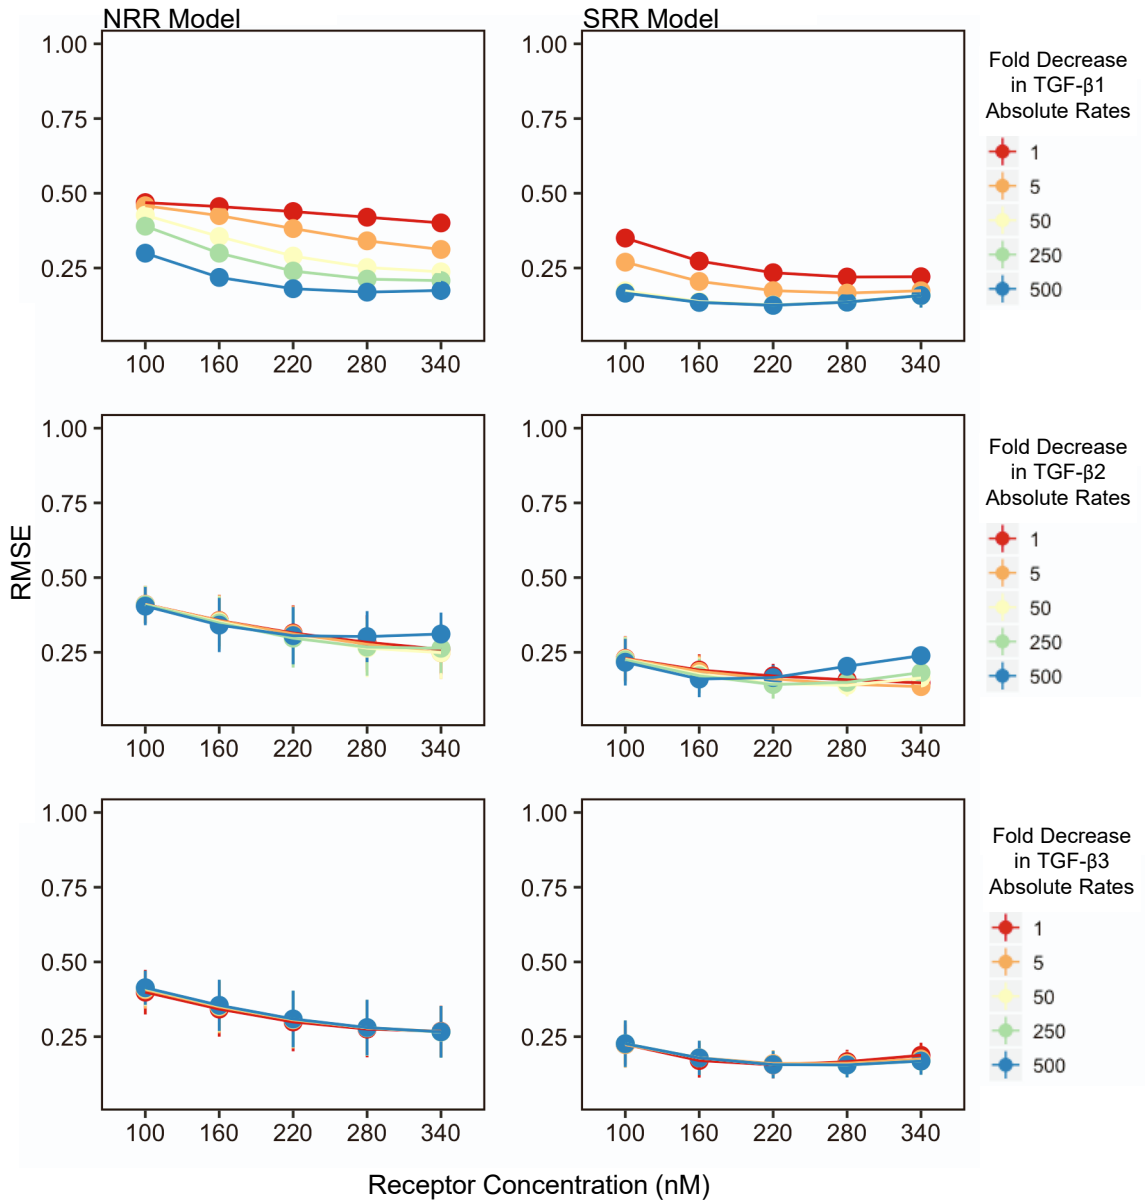

Supplement: mmc1.pdf [file mmc1.pdf]
