# Supplementary material
Source: PubMed Central journal article supplement (PMC10111353)

# Supplemental Figure S2

Minimal Effects in Decreasing Absolute Rates for TRR Model Degree Recruitment

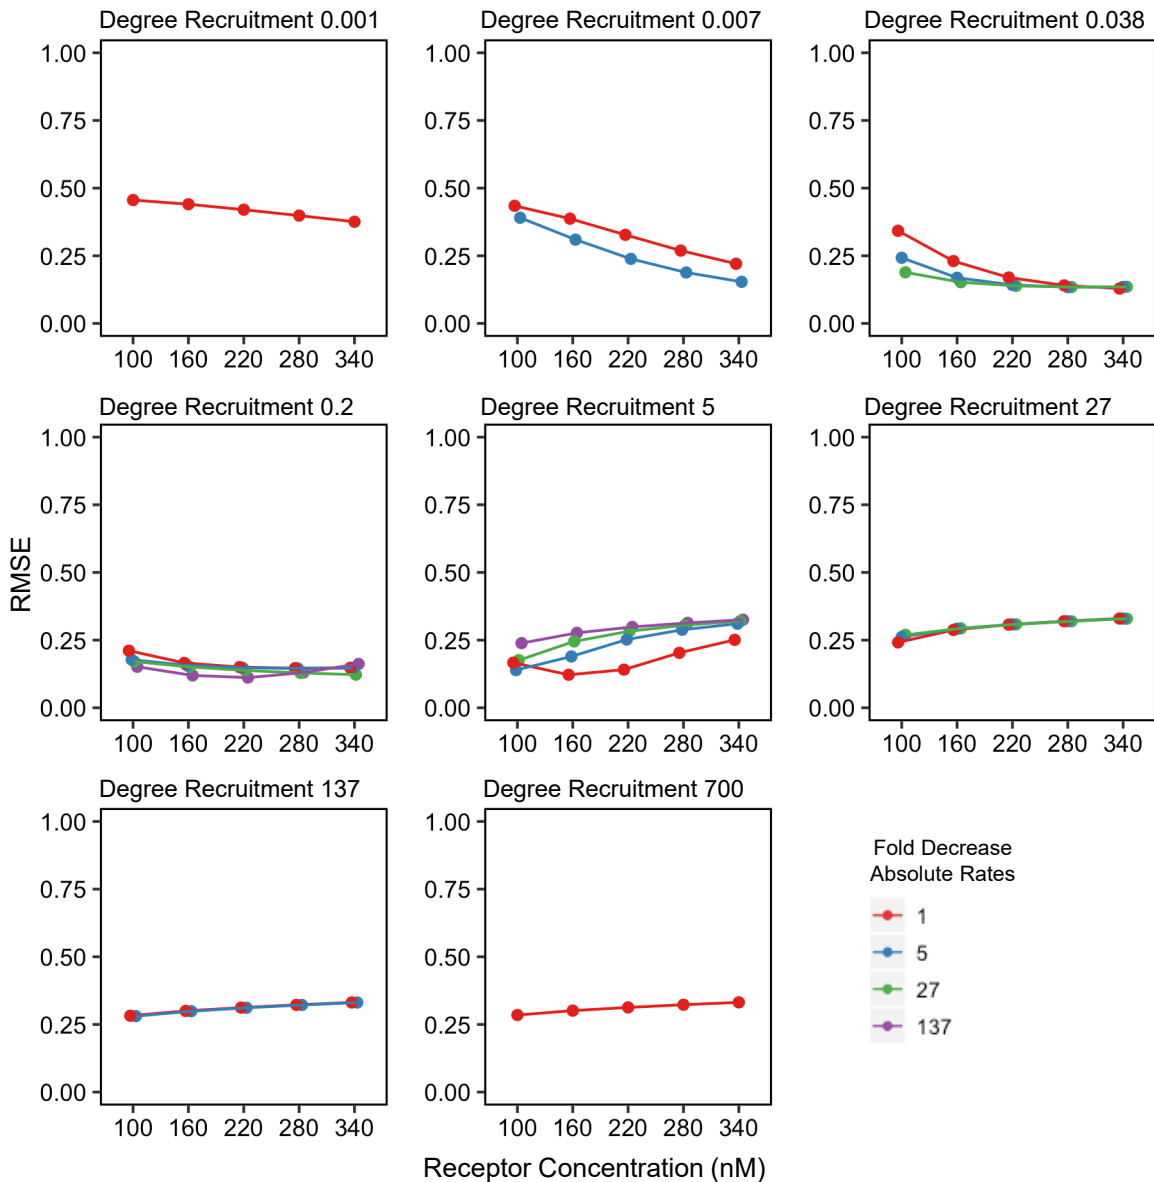

Supplement: mmc2.pdf [file mmc2.pdf]
