# Supplementary material
Source: PubMed Central journal article supplement (PMC10111353)

# Supplemental Figure S3

Wide Screen for Selecting TRR  
Model Degree Recruitment

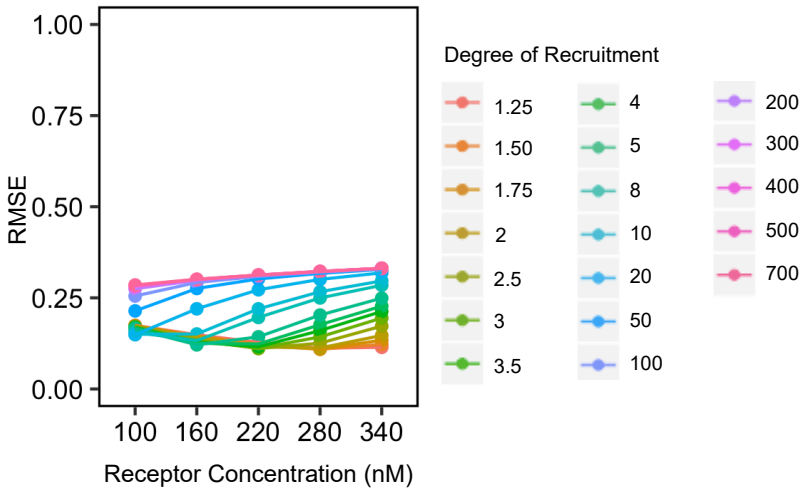

Supplement: mmc3.pdf [file mmc3.pdf]

# Supplemental Figure S4

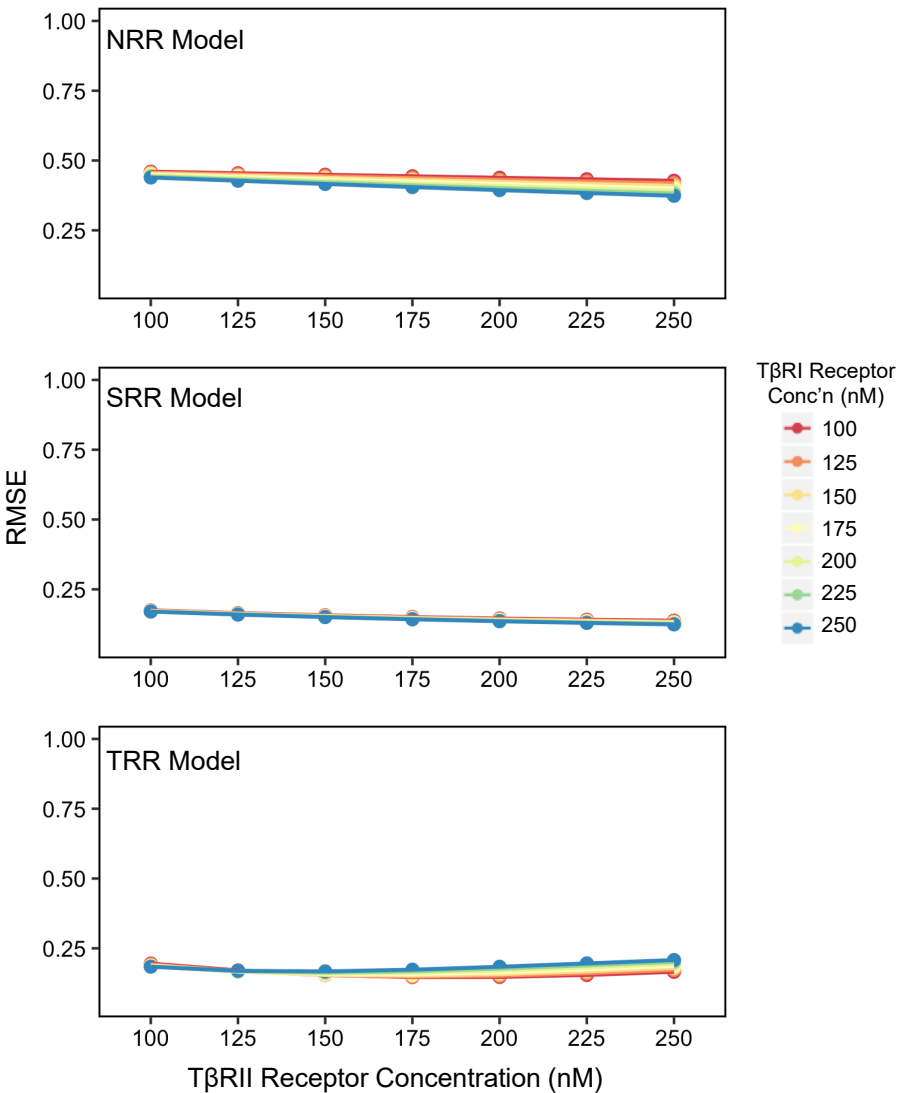

Supplement: mmc4.pdf [file mmc4.pdf]
